# Supplementary material
Source: Springer Nature journal article supplement (https://www.springermedizin.de/resource/supplementary/12906_2013_1570_MOESM2_ESM.pdf/9522278)
Supplement: MOESM2 [file 9522278]

## Adverse event dosage forms

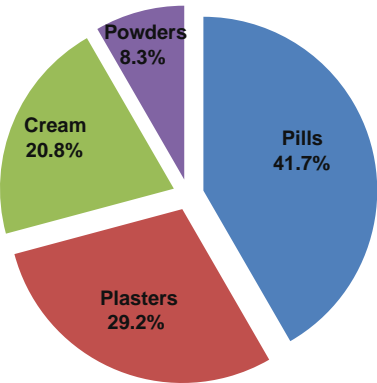

## Types of Adverse Events

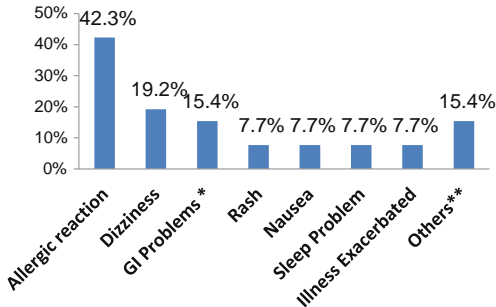

\* GI Problems include diarrhea, stomach, severe abdominal cramps

\*\*All other adverse events include 1 case each of the following: blisters, heart problems, fever, spasmodic coughing
